# Supplementary material
Source: publisher figshare collection journal article supplement (https://acs.figshare.com/ndownloader/files/29103843)
Supplement: Supplementary file 1 [file 29103843]

## **Supporting Information**

### **UiO-66-NH<sub>2</sub> Fabrics: Role of Trifluoroacetic Acid as Modulator on MOF Uniform Coating on Electrospun Nanofibers and Efficient Decontamination of Chemical Warfare Agent Simulants**

Xiuling Zhang<sup>1,2,3,†</sup>, Yaxin Sun<sup>1,2,3,†</sup>, Yuanfeng Liu<sup>1,2,3</sup>, Zhenyu Zhai<sup>1,2,3</sup>, Shiquan Guo<sup>1,2,3</sup>, Lichong Peng<sup>1,2,3</sup>, Yue Qin<sup>1,2,3</sup>, Congju Li<sup>1,2,3\*</sup>

1 School of Energy and Environmental Engineering, University of Science and Technology Beijing, Beijing 100083, China;

2 Beijing Key Laboratory of Resource-oriented Treatment of Industrial pollutants, Beijing 100083, China;

3 Energy Conservation and Environmental Protection Engineering Research Center in Universities of Beijing, Beijing 100083, China.

Corresponding author: congjuli@126.com

**UiO-66-NH<sub>2</sub> powder:** 0.233 g of Zirconium tetrachloride (ZrCl<sub>4</sub>) and 0.181 g of BDC-NH<sub>2</sub> were mixed with 0.16 mL of 12 M HCl and 10 mL DMF solvent. After that, benzoic acid (0.244 g) was added to the above solution by ultrasonication until the precursors were completely dissolved. Subsequently, the solution was transferred into 50 mL Teflon-lined autoclave for 48 h at 120 °C. Finally, the sample was washed with DMF and ethanol for three times, respectively and dried under vacuum oven (24 h, 60 °C). The sample was denoted by UiO-66-NH<sub>2</sub> powder without TFA.

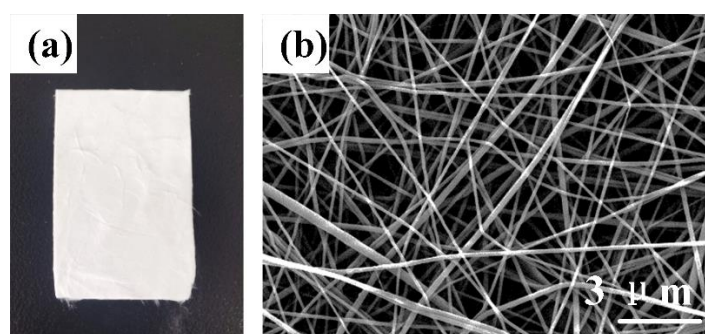

**Figure S1.** (a) Optical image and (b) SEM image of bulk PAN nanofiber membrane.

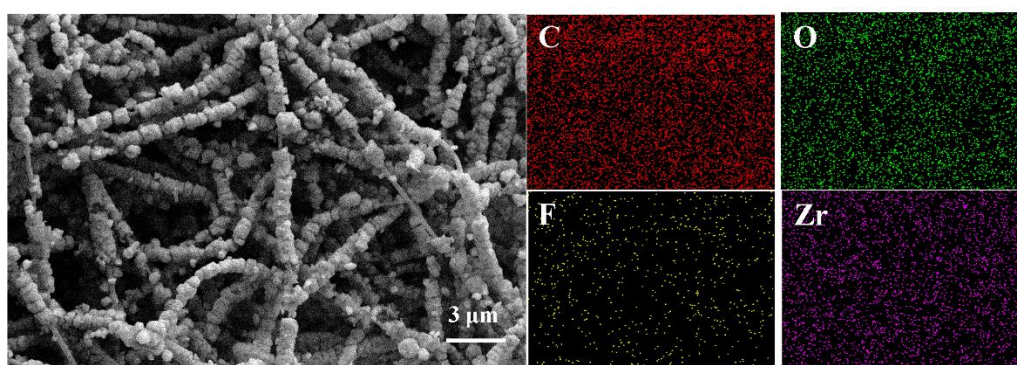

**Figure S2.** The Element mapping images of C, O, F and Zr in UiO-66-NH<sub>2</sub>@PAN-2h.

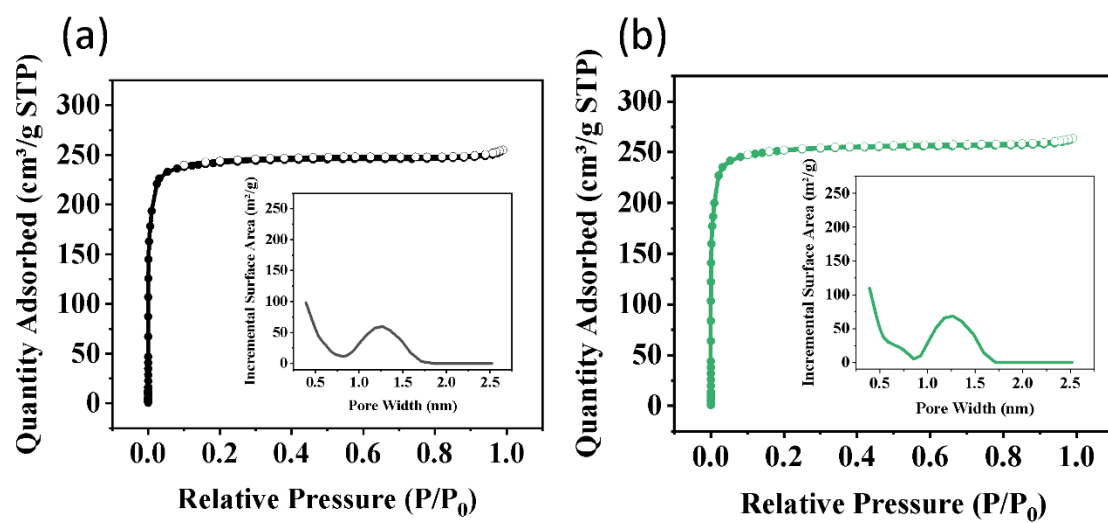

**Figure S3.**  $N_2$  sorption isotherms of UiO-66-NH<sub>2</sub>@PAN-1h (a) and UiO-66-NH<sub>2</sub>@PAN-4h (b) the distribution of pore size of inset images.

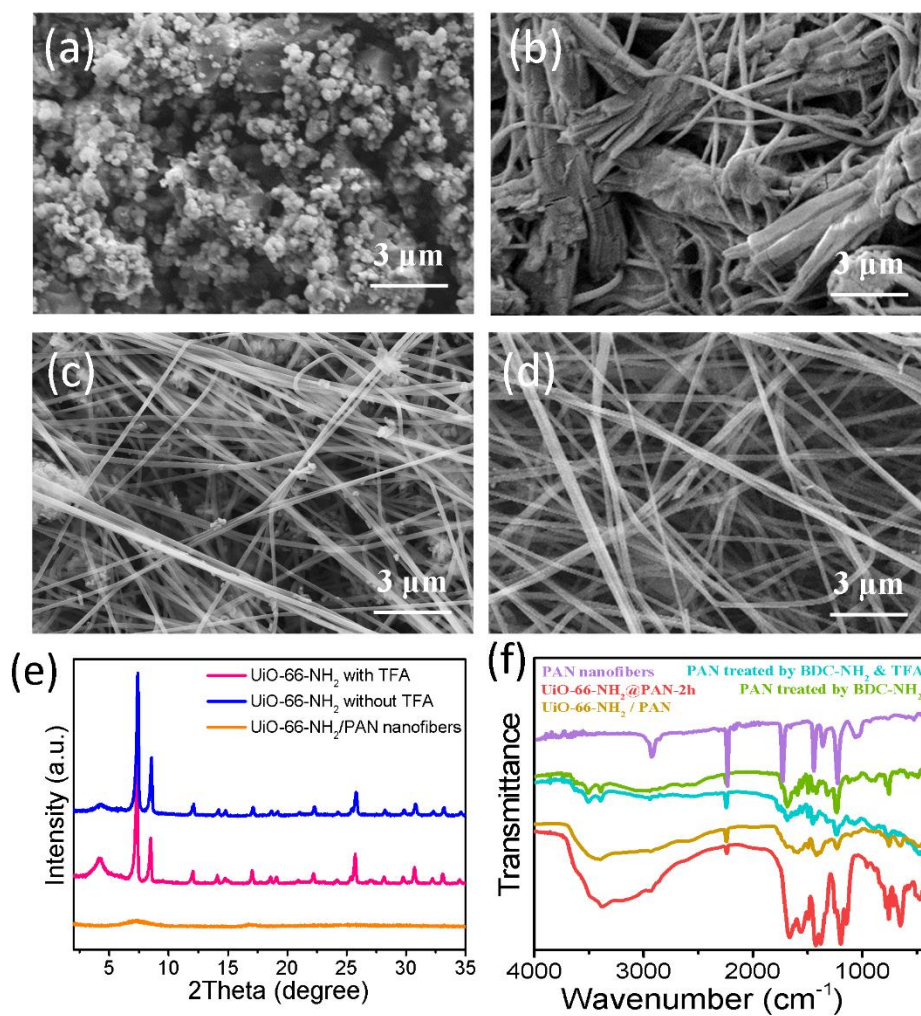

**Figure S4.** SEM images of UiO-66-NH<sub>2</sub> powder (a); SEM images of UiO-66-NH<sub>2</sub>/PAN nanofibers (b), PAN nanofibers only treated by BDC-NH<sub>2</sub> (c), PAN nanofibers treated by BDC-NH<sub>2</sub> and TFA for 2 h (d); XRD patterns (e), FTIR spectrum of different samples (f).

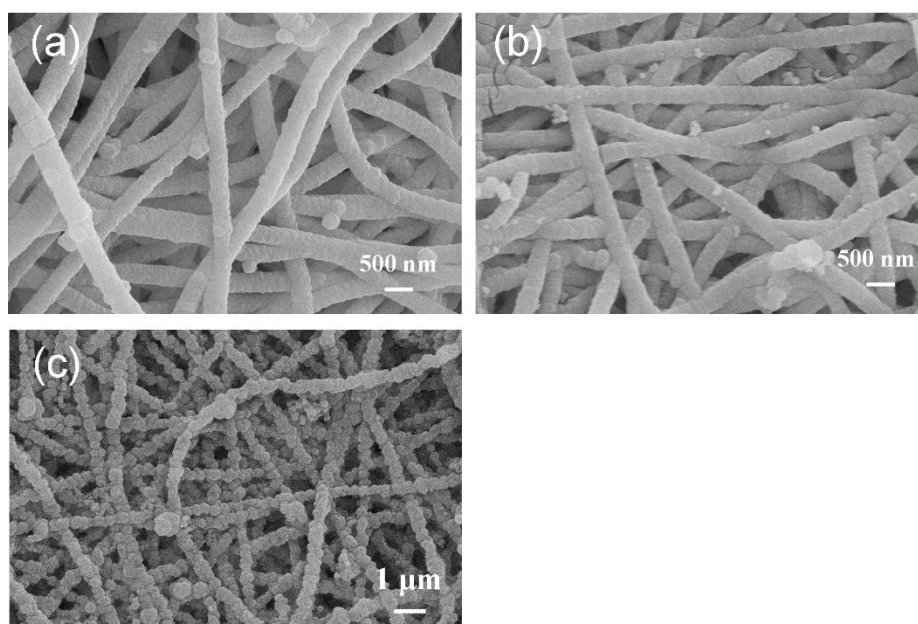

**Figure S5.** SEM images indicating the changes of PAN fibers surface. After reaction of 10 min (a), 20 min (b) and 30 min (c).

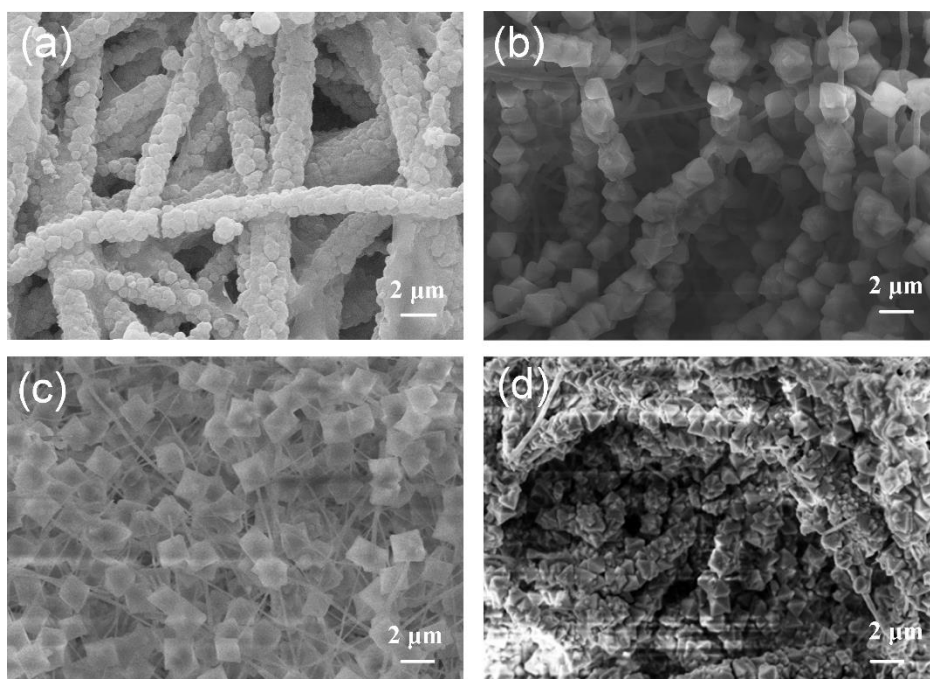

**Figure S6.** The SEM images of UiO-66-NH<sub>2</sub>@TPU (a), MOF-808@PAN (b), UiO-66-NO<sub>2</sub>@PAN (c) and UiO-66-NO<sub>2</sub>@PVDF (d).

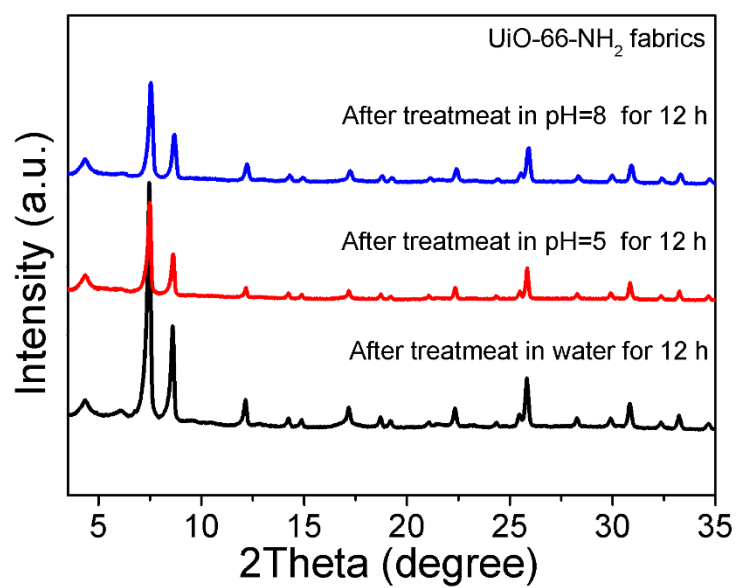

**Figure S7.** The PXRD of UiO-66-NH<sub>2</sub>@PAN-2h after treated with different aqueous solution.

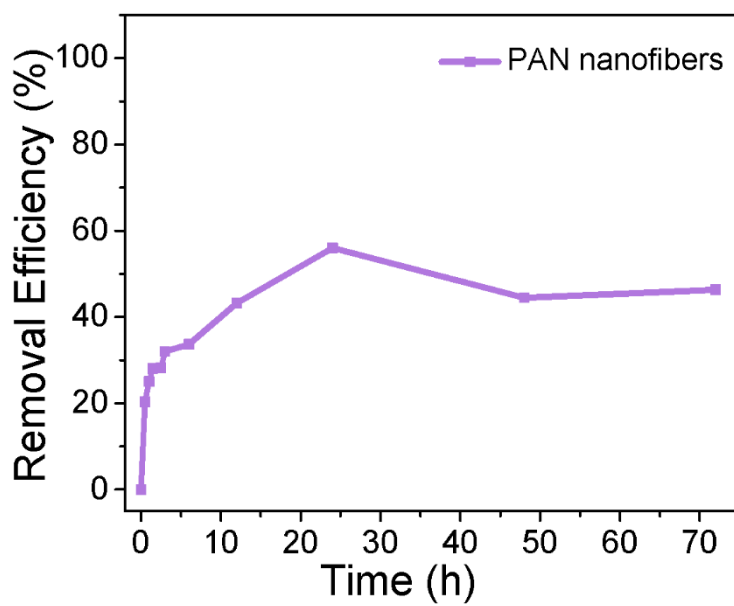

**Figure S8.** The profiles of removal efficiency for PAN.

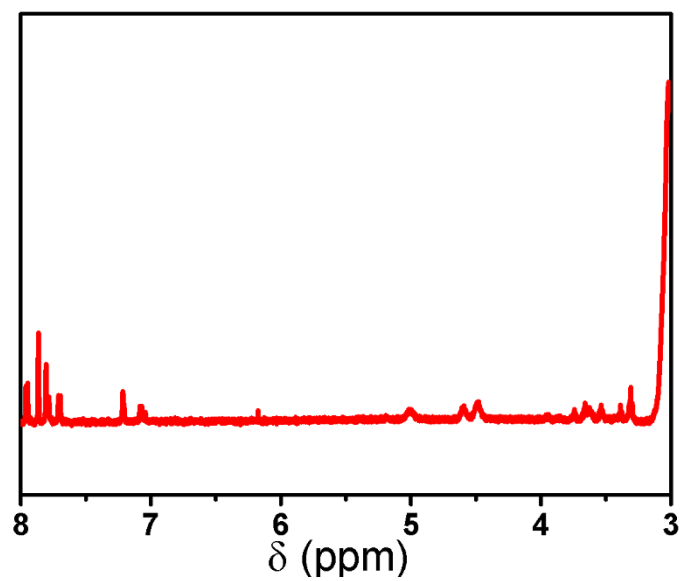

**Figure S9.**  $^1\text{H}$  NMR of UiO-66- $\text{NH}_2$ @PAN-2h exposed to CEES for 72 h and digested in  $\text{H}_2\text{SO}_4/\text{DMSO}$ .

**Table S1.** FTIR modes of PAN and UiO-66-NH<sub>2</sub>@PAN composite materials.

| Wavenumber (cm <sup>-1</sup> ) | Mode                              |
|--------------------------------|-----------------------------------|
| 2935                           | C-H stretching vibration          |
| 2240                           | -CN group stretching vibration    |
| 1454                           | CH <sub>2</sub> bending vibration |
| 680, 764                       | Zr-O                              |
| 1569, 1430, 1389               | COO <sup>-</sup>                  |
| 3488, 3380, 1626               | -NH <sub>2</sub>                  |

**Table S2.** The comparison of four samples of BET.

| Sample                         | S <sub>BET</sub> (m <sup>2</sup> /g) | Pore volume (cm <sup>3</sup> /g) | Average pore size (nm) |
|--------------------------------|--------------------------------------|----------------------------------|------------------------|
| UiO-66-NH <sub>2</sub> @PAN-1h | 816.4                                | 0.395                            | 1.933                  |
| UiO-66-NH <sub>2</sub> @PAN-2h | 958.7                                | 0.459                            | 1.916                  |
| UiO-66-NH <sub>2</sub> @PAN-4h | 849.6                                | 0.407                            | 1.921                  |

**Table S3.** The mass change after washing in different pH.

|                     | Before cleaning<br>m <sub>1</sub> (mg) | After cleaning 12h<br>m <sub>2</sub> (mg) | Mass loss (%) |
|---------------------|----------------------------------------|-------------------------------------------|---------------|
| Deionized water     | 10.92                                  | 10.03                                     | 8.15          |
| NaOH (aq)<br>pH=8.0 | 13.22                                  | 12.54                                     | 5.14          |
| HCl (aq)<br>pH=5.0  | 11.85                                  | 11.03                                     | 6.92          |
